# Supplementary material for: The Role of the Immune Metabolic Prognostic Index in Patients with Non-Small Cell Lung Cancer (NSCLC) in Radiological Progression during Treatment with Nivolumab
Source: MDPI journal article supplement (doi:10.3390/cancers13133117), 2021-06-22
Supplement: s1 [file s1]

Article

# Supplementary Material: The Role of the Immune Metabolic Prognostic Index in Patients with Non-Small Cell Lung Cancer (NSCLC) in Radiological Progression during Treatment with Nivolumab

Matteo Bauckneht <sup>1,\*</sup>, Carlo Genova <sup>2,3</sup>, Giovanni Rossi <sup>2</sup>, Erika Rijavec <sup>4</sup>, Maria Giovanna Dal Bello <sup>2</sup>, Giulia Ferrarazzo <sup>1</sup>, Marco Tagliamento <sup>2</sup>, Maria Isabella Donegani <sup>1,5</sup>, Federica Biello <sup>6</sup>, Silvia Chiola <sup>1,5</sup>, Lodovica Zullo <sup>7</sup>, Stefano Raffa <sup>1,5</sup>, Francesco Lanfranchi <sup>1,5</sup>, Giuseppe Cittadini <sup>8</sup>, Cecilia Marini <sup>5,9</sup>, Egesta Lopci <sup>10</sup>, Gianmario Sambuceti <sup>1,5</sup>, Francesco Grossi <sup>4</sup> and Silvia Morbelli <sup>1,5</sup>

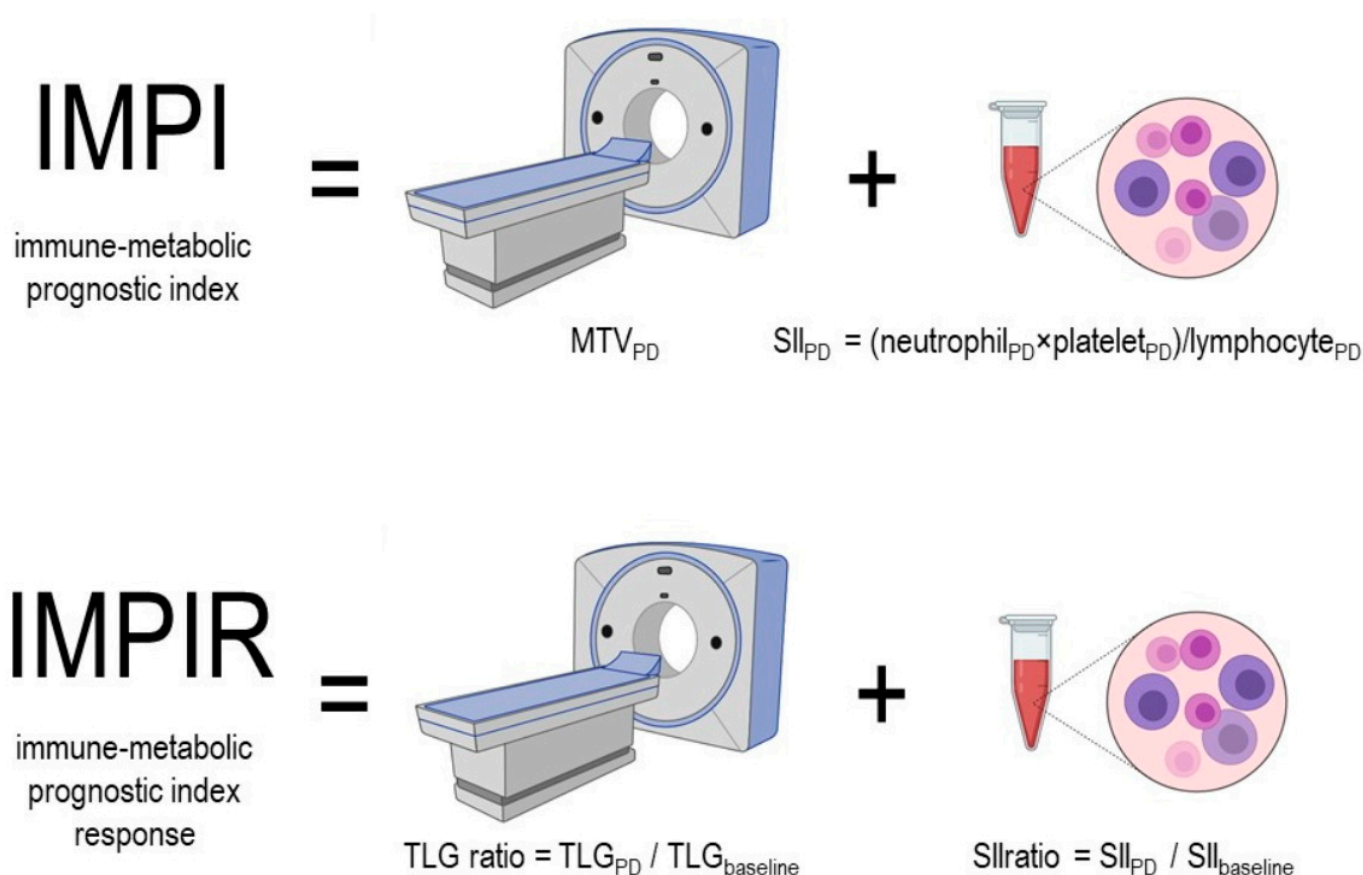

Figure S1. IMPI and IMPIR calculation.
